# Supplementary material
Source: publisher site journal article supplement (https://www.spandidos-publications.com/2956/downloadSupplementary)
Supplement: Supplementary file 1 [file downloadSupplementary]

Figure S1. Images of the patients. Computed tomography scan images of liver cancer patients before and following TACE. The arrow points to the tumor. TACE, transarterial chemoembolization; prior TACE, prior to TACE treatment; TACE1, after the first TACE operation; TACE2, after the second TACE operation.

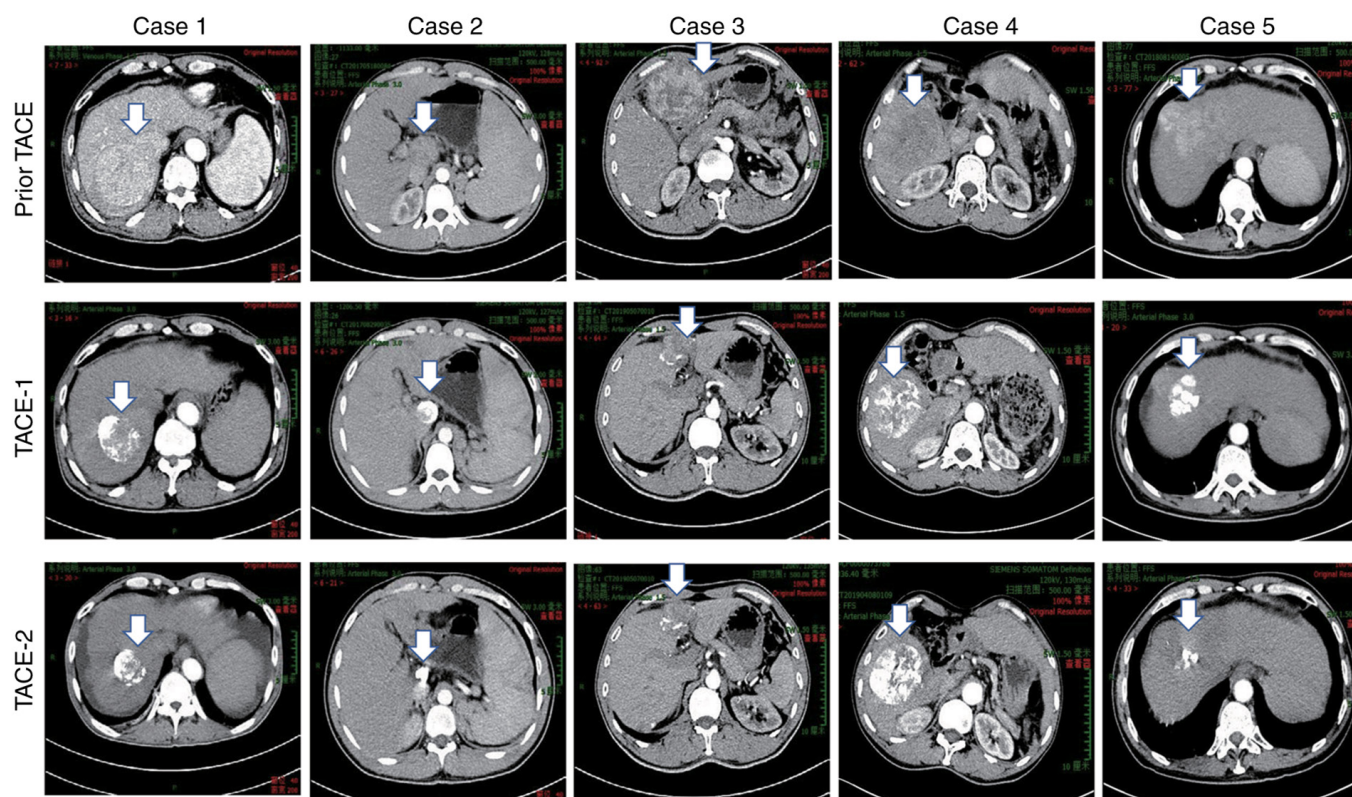

Figure S2. Changes of circRNAs and mRNAs in patients before and after TACE treatment (A) Circ-G004213 expression in blood of patients with LC. (B) RT-qPCR detection of circ\_GABRG3 expression in blood of patients with LC. (C) Circ-G004213 target mRNAs (PRPF39 and ZWINT), which were positive with the prognosis of LC. (D) Circ-G004213 target mRNAs (GINS2, ZIC2, DR1 and CREB3L3), which were negative with the prognosis of LC. \*P<0.05 and NS vs. the corresponding samples of the prior TACE group. Data are presented as means  $\pm$  SEM of at least three independent experiments. LC, liver cancer; RT-qPCR, reverse transcription-quantitative PCR; NS, no significant difference; TACE, transarterial chemoembolization; prior TACE, prior to TACE treatment; TACE1, after the first TACE operation; TACE2, after the second TACE operation.

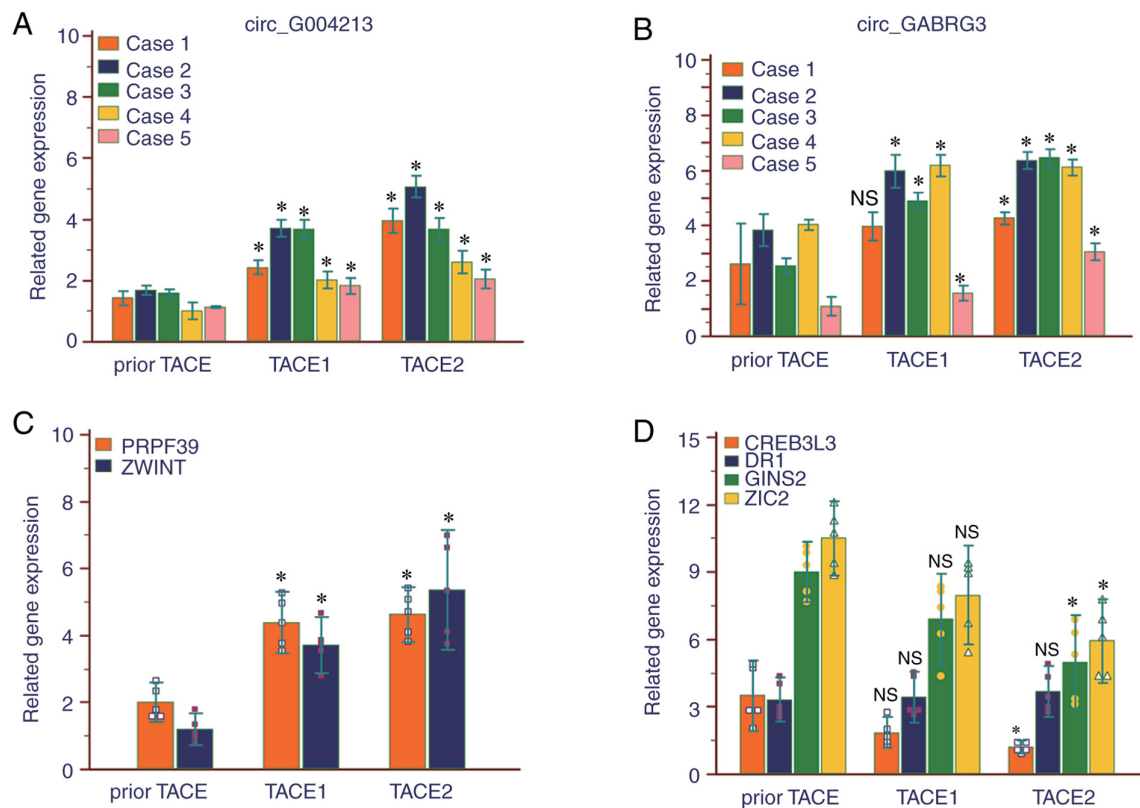

Figure S3. CircRNA-G004213-miRNA-513b-5p-PRPF39 network analysis. (A) Circ-G004213 overexpression (circ-G004213-OE), negative control (Vector-NC), circ-G004213 knockout (si-circ-G004213) and negative control (si-NC) were detected the circ-G004213 expression in the HepG2 cells by RT-qPCR. (B) HepG2 cells transfection with miR-513b-5P mimics, mimics-NC, miR-513b-5P inhibitor and inhibitor-NC were detected of miR-513b-5p expression by RT-qPCR (C) lv-PRPF39, lv-vector, sh-PRPF39 and sh-NC of HepG2 cells were detected of PRPF39 expression by RT-qPCR. (D) RT-qPCR detection of miR-513b-5p expression in in the HepG2 transplanted tumor. (E) RT-qPCR and western-blot detection of PRPF39 in the HepG2 transplanted tumor.  $P < 0.05$ . Data are presented as means  $\pm$  SEM of at least three independent experiments. si, short interfering; RT-qPCR, reverse transcription-quantitative PCR; NS, no significant difference; miRNA, microRNA; sh, short hairpin.

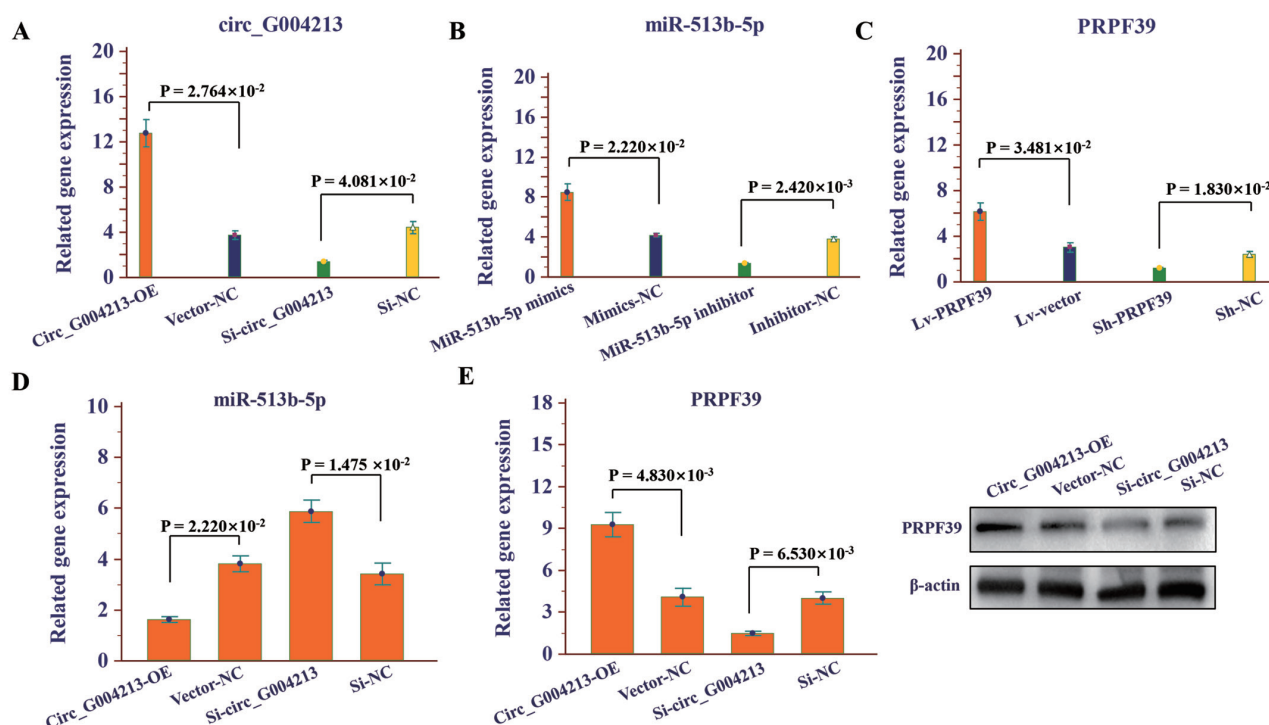

Table SI. Primer sequences.

|                                 | Forward primer                  | Reverse primer                   |
|---------------------------------|---------------------------------|----------------------------------|
| <i>circ_G004213</i>             | 5'-GATTCTTAGACTCCAGAACAAGAGT-3' | 5'-TCTGTGCTATGACAGTGCAGTATTG-3'  |
| <i>circ_GABRG3</i>              | 5'-CAAGTGATCCTACCGCCTCGGCCT-3'  | 5'-TCAGTATGACAAGTGGAATGAAAGTC-3' |
| <i>GINS2</i>                    | 5'-TCCCGAAGGCAGACGAAATC-3'      | 5'-ATAGCCTCAGCAGACGGGAG-3'       |
| <i>ZIC2</i>                     | 5'-AGCACATGAAGGTACCACCG-3'      | 5'-TGGACCTGCAAGACAAAAGCC-3'      |
| <i>DRI</i>                      | 5'-AAGGCCAGTTCTCGTTTGGA-3'      | 5'-GGGAATCCTCTGGGTATGTCT-3'      |
| <i>PRPF39</i>                   | 5'-GAAGTGCCATCTTCGGCTAGG-3'     | 5'-TGTTGCCTGTGCTGCCATTA-3'       |
| <i>ZWINT</i>                    | 5'CCTTCCTCCAGCTTCTGTATACCC-3'   | 5'-AAGGCCTGAGTTGGGTCTGA-3'       |
| <i>CREB3L3</i>                  | 5'-ATCCTGGCAACTCTTGCTCC-3'      | 5'-AGGTGATGCTGTTGCAGGTC-3'       |
| <i><math>\beta</math>-actin</i> | 5'-AAGGTGACAGCAGTCGGTTGG-3'     | 5'-GGCAAGGGACTTCCTGTAACAATG-3'   |

Table SII. Clinicopathological features of patients.

| Characteristics  | Case 1               | Case 2               | Case 3 | Case 4             | Case 5               |
|------------------|----------------------|----------------------|--------|--------------------|----------------------|
| Gender           | Male                 | Male                 | Male   | Male               | Male                 |
| Age (years)      | 66                   | 26                   | 48     | 62                 | 65                   |
| HBV (copies/ml)  |                      |                      |        |                    |                      |
| Prior TACE       | 5.28x10 <sup>4</sup> | 1.14x10 <sup>4</sup> | N/A    | <1x10 <sup>3</sup> | 7.40x10 <sup>3</sup> |
| TACE-1           | <1x10 <sup>3</sup>   | 1.12x10 <sup>5</sup> | N/A    | <1x10 <sup>3</sup> | <1x10 <sup>3</sup>   |
| TACE-2           | <1x10 <sup>3</sup>   | <1x10 <sup>3</sup>   | N/A    | <1x10              | <1x10 <sup>3</sup>   |
| AFP (ng/ml)      |                      |                      |        |                    |                      |
| Prior TACE       | >3,000               | >3,000               | 159.29 | 260.93             | 182.19               |
| TACE-1           | 181.10               | 599.25               | 74.50  | 88.32              | 92.65                |
| TACE-2           | 24.60                | 80.29                | 19.59  | 144.37             | 22.37                |
| TNM stage        |                      |                      |        |                    |                      |
| Prior TACE       | III A                | II                   | III A  | III B              | III A                |
| TACE-1           | II                   | I                    | III A  | III B              | III A                |
| TACE-2           | II                   | I                    | III A  | III B              | II                   |
| BCLC stage       |                      |                      |        |                    |                      |
| Prior TACE       | B                    | A3                   | B      | B                  | B                    |
| TACE-1           | B                    | A3                   | A4     | B                  | B                    |
| TACE-2           | A4                   | A3                   | A4     | B                  | B                    |
| Child-Pugh score |                      |                      |        |                    |                      |
| Prior TACE       | 6                    | 5                    | 6      | 5                  | 5                    |
| TACE-1           | 5                    | 5                    | 6      | 6                  | 7                    |
| TACE-2           | 6                    | 5                    | 6      | 6                  | 6                    |

HBV, hepatitis virus B; AFP,  $\alpha$ -fetoprotein; prior TACE, prior to TACE treatment; TACE1, after the first TACE operation; TACE2, after the second TACE operation; BCLC, Barcelona Clinic Liver Cancer staging classification.
